# Supplementary material for: Seroprevalence of Mycobacterium avium subsp. paratuberculosis in Swiss dairy herds and risk factors for a positive herd status and within-herd prevalence
Source: PubMed Central journal article supplement (PMC11242548; doi:10.3389/fvets.2024.1409694), 2024-06-28
Supplement: table_1.pdf [file table_1.pdf]

## *Supplementary Material*

### **Seroprevalence of *Mycobacterium avium* subsp. *paratuberculosis* in Swiss dairy herds and risk factors for a positive herd status and within-herd prevalence**

**M. Ottardi<sup>1</sup>, I. Lechner<sup>2</sup>, J. Wang<sup>2</sup>, S. Schmitt<sup>3</sup>, M. Schneeberger<sup>3</sup>, R.M. Schmid<sup>1</sup>, R. Stephan<sup>3</sup>, M. Meylan<sup>1\*</sup>**

<sup>1</sup>Clinic for Ruminants, Vetsuisse Faculty, University of Bern, CH-3012 Bern

<sup>2</sup>SAFOSO AG, CH-3097 Liebefeld

<sup>3</sup>Institute for Food Safety and Hygiene, Section of Veterinary Bacteriology, Vetsuisse Faculty, University of Zürich, CH-8057 Zürich

**\* Correspondence:**

Mireille Meylan

[mireille.meylan@unibe.ch](mailto:mireille.meylan@unibe.ch)

#### **1 Supplementary Table S1**

**Table S1.** Results of the univariable logistic regression model assessing possible associations between risk factors and herd serostatus (seropositive or seronegative for paratuberculosis) in 163 Swiss dairy herds (9 seropositive, 154 seronegative); variables with  $p < 0.2$  are indicated in bold and were carried forward for the multivariable regression model

| Variable                                                                      | Coefficient | OR <sup>1</sup> | SE <sup>2</sup> | 95% CI <sup>3</sup> | p value      |
|-------------------------------------------------------------------------------|-------------|-----------------|-----------------|---------------------|--------------|
| Type(s) of production on the farm                                             |             |                 |                 |                     |              |
| Dairy with fattening of own or purchased animals (vs. exclusively dairy)      | 1.13        | 3.1             | 1.14            | 0.33-28.77          | 0.323        |
| Presence of a bull in the herd                                                |             |                 |                 |                     |              |
| Purchased (vs. no or born on the farm)                                        | -0.4        | 0.7             | 0.82            | 0.13-3.35           | 0.627        |
| Origin of the farm's water supply                                             |             |                 |                 |                     |              |
| Private well (vs. communal water only)                                        | 0.12        | 1.1             | 0.69            | 0.29-4.35           | 0.865        |
| Contact of heifers with animals from other herds during the grazing period    |             |                 |                 |                     |              |
| Yes (vs. no)                                                                  | -0.16       | 0.9             | 0.73            | 0.20-3.53           | 0.824        |
| <b>Contact of lactating cows with animals from other herds during grazing</b> |             |                 |                 |                     |              |
| Yes (vs. no)                                                                  | 2.25        | 9.5             | 1.28            | 0.78-116.15         | <b>0.078</b> |
| Contact of dry cows with animals from other herds during the grazing period   |             |                 |                 |                     |              |
| Yes (vs. no)                                                                  | 1.32        | 3.7             | 1.15            | 0.39-35.76          | 0.254        |
| Pre-weaned calves sharing alpine pasture with animals from other herds        |             |                 |                 |                     |              |
| Yes (vs. no)                                                                  | -13.74      | <0.001          | 1696.73         | 0-Inf               | 0.994        |

## Supplementary Material

|                                                                         |        |        |         |            |              |
|-------------------------------------------------------------------------|--------|--------|---------|------------|--------------|
| Post-weaned calves sharing alpine pasture with animals from other herds |        |        |         |            |              |
| Yes                                                                     | -15.88 | <0.001 | 1390.63 | 0-Inf      | 0.991        |
| (vs. no)                                                                |        |        |         |            |              |
| <b>Heifers sharing alpine pasture with animals from other herds</b>     |        |        |         |            |              |
| Yes                                                                     | -1.47  | 0.2    | 0.71    | 0.06-0.92  | <b>0.038</b> |
| (vs. no)                                                                |        |        |         |            |              |
| Lactating cows sharing alpine pasture with animals from other herds     |        |        |         |            |              |
| Yes                                                                     | -0.58  | 0.6    | 1.08    | 0.07-4.68  | 0.595        |
| (vs. no)                                                                |        |        |         |            |              |
| Dry cows sharing alpine pasture with animals from other herds           |        |        |         |            |              |
| Yes                                                                     | -15.88 | <0.001 | 1390.63 | 0-Inf      | 0.991        |
| (vs. no)                                                                |        |        |         |            |              |
| Participation to cattle shows                                           |        |        |         |            |              |
| Yes                                                                     | -0.22  | 0.8    | 0.73    | 0.19-3.34  | 0.765        |
| (vs. no)                                                                |        |        |         |            |              |
| Purchase of breeding animals                                            |        |        |         |            |              |
| Yes                                                                     | 0.01   | 1      | 0.73    | 0.24- 4.20 | 0.989        |
| (vs. no)                                                                |        |        |         |            |              |
| <b>Source of animals for purchase</b>                                   |        |        |         |            |              |
| Purchase from $\geq 1$ farm                                             | 1.2    | 3.3    | 0.82    | 0.67-16.51 | <b>0.142</b> |
| (vs. no purchase)                                                       |        |        |         |            |              |
| Information requested about the source farms prior to purchase          |        |        |         |            |              |
| Yes                                                                     | -0.82  | 0.4    | 1.12    | 0.05-3.95  | 0.462        |
| (vs. no)                                                                |        |        |         |            |              |
| Heifers raised on rearing farm                                          |        |        |         |            |              |
| Yes                                                                     | -0.58  | 0.6    | 0.82    | 0.11-2.79  | 0.48         |
| (vs. no)                                                                |        |        |         |            |              |
| <b>Herd size (all cows <math>\geq 2</math> years)</b>                   | 1.6    | 5      | 0.8     | 1.03-23.89 | <b>0.046</b> |

<sup>1</sup>OR: Odd Ratio

<sup>2</sup>SE: Standard Error

<sup>3</sup>CI: Confidence Interval

See also Tables I and II for definitions of the variables
