# Supplementary material for: Seroprevalence of Mycobacterium avium subsp. paratuberculosis in Swiss dairy herds and risk factors for a positive herd status and within-herd prevalence
Source: PubMed Central journal article supplement (PMC11242548; doi:10.3389/fvets.2024.1409694), 2024-06-28
Supplement: table_2.pdf [file table_2.pdf]

## *Supplementary Material*

# **Seroprevalence of *Mycobacterium avium* subsp. *paratuberculosis* in Swiss dairy herds and risk factors for a positive herd status and within-herd prevalence**

**M. Ottardi<sup>1</sup>, I. Lechner<sup>2</sup>, J. Wang<sup>2</sup>, S. Schmitt<sup>3</sup>, M. Schneeberger<sup>3</sup>, R.M. Schmid<sup>1</sup>, R. Stephan<sup>3</sup>, M. Meylan<sup>1\*</sup>**

<sup>1</sup>Clinic for Ruminants, Vetsuisse Faculty, University of Bern, CH-3012 Bern

<sup>2</sup>SAFOSO AG, CH-3097 Liebefeld

<sup>3</sup>Institute for Food Safety and Hygiene, Section of Veterinary Bacteriology, Vetsuisse Faculty, University of Zürich, CH-8057 Zürich

**\* Correspondence:**

Mireille Meylan

[mireille.meylan@unibe.ch](mailto:mireille.meylan@unibe.ch)

### **1 Supplementary Table S2**

**Table S2.** Results of the univariable logistic regression model assessing possible associations between risk factors and within-herd seroprevalence in 163 Swiss dairy herds (9 seropositive, 154 seronegative); variables with  $p < 0.2$  are indicated in bold and were carried forward for the multivariable regression model

| Variable                                        | Coefficient | SE <sup>1</sup> | 95% CI <sup>2</sup> | p value |
|-------------------------------------------------|-------------|-----------------|---------------------|---------|
| Presence of other ruminants on the farm         |             |                 |                     |         |
| Yes                                             | 0.08        | 0.14            | -0.20-0.36          | 0.58    |
| (vs. no)                                        |             |                 |                     |         |
| Presence of pigs on the farm                    |             |                 |                     |         |
| ≥ 20 pigs                                       | 0.01        | 0.19            | -0.37-0.39          | 0.95    |
| < 20 pigs                                       | -0.21       | 0.25            | -0.71-0.29          | 0.42    |
| (vs. none)                                      |             |                 |                     |         |
| Contact with other cows during calving          |             |                 |                     |         |
| Intensive contact (group calving box)           | 0.03        | 0.15            | -0.25-0.32          | 0.80    |
| Low contact intensity                           | -0.003      | 0.19            | -0.38-0.37          | 0.98    |
| (vs. only individual calving)                   |             |                 |                     |         |
| Bedding management for calving                  |             |                 |                     |         |
| Same bedding used for several calvings          | 0.04        | 0.28            | -0.14-0.95          | 0.41    |
| Pen or stall freshly bedded before each calving | -0.027      | 0.17            | -0.61-0.07          | 0.26    |
| (vs. change of bedding after each calving)      |             |                 |                     |         |
| Gloves for the care of newborn calves           |             |                 |                     |         |
| Yes                                             | 0.2         | 0.35            | -0.49-0.90          | 0.57    |
| (vs. no)                                        |             |                 |                     |         |
| Use of the calving pen as sick pen              | 0.02        | 0.05            | -0.08-0.12          | 0.68    |
| Always                                          | 0.08        | 0.18            | -0.27-0.43          | 0.65    |
| Often                                           | -0.11       | 0.23            | -0.58-0.35          | 0.62    |
| Rarely                                          | 0.05        | 0.19            | -0.34-0.44          | 0.80    |
| (vs. never)                                     |             |                 |                     |         |
| Drinking of colostrum from the dam's udder      |             |                 |                     |         |
| Yes                                             | -0.14       | 0.13            | -0.40-0.12          | 0.30    |
| (vs. no)                                        |             |                 |                     |         |
| Housing of the young animals                    |             |                 |                     |         |
| Neonates (first 2-3 weeks of life)              |             |                 |                     |         |

Supplementary Material

|                                                                             |                |              |                          |              |
|-----------------------------------------------------------------------------|----------------|--------------|--------------------------|--------------|
| Group pen<br>(vs. individual hutch)                                         | 0.02           | 0.13         | -0.24-0.28               | 0.89         |
| Pre-weaned calves                                                           |                |              |                          |              |
| Not on the farm (rearing farm)                                              | 0.2            | 0.49         | -0.77-1.18               | 0.68         |
| Group pen<br>(vs. individual hutch)                                         | -0.02          | 0.65         | -1.28-1.28               | 1            |
| Post-weaned calves                                                          |                |              |                          |              |
| Not on the farm (rearing farm)<br>(vs. group pen)                           | 0.11           | 0.18         | -0.24-0.47               | 0.52         |
| Risk of fecal contamination from the cows to the calves' environment        |                |              |                          |              |
| Neonates (first 2-3 weeks of life)                                          |                |              |                          |              |
| High risk (direct contact in the barn)                                      | -0.25          | 0.52         | -1.27-0.77               | 0.62         |
| Low risk (indirect contact through equipment and/or boots)<br>(vs. no risk) | -0.39          | 0.43         | -1.24-0.44               | 0.35         |
| Pre-weaned calves                                                           |                |              |                          |              |
| High risk (direct contact in the barn)                                      | -0.01          | 0.47         | -0.94-0.92               | 0.97         |
| Moderate risk (direct contact on pasture)                                   | -0.38          | 0.6          | -1.57-0.8                | 0.52         |
| Low risk (indirect contact through equipment and/or boots)<br>(vs. no risk) | -0.2           | 0.35         | -0.9-0.49                | 0.57         |
| Post-weaned calves                                                          |                |              |                          |              |
| High risk (direct contact in the barn)                                      | <0.001         | 0.41         | -0.81-0.81               | 1            |
| Moderate risk (direct contact on pasture)                                   | 0.21           | 0.24         | -0.26-0.68               | 0.38         |
| Low risk (indirect contact through equipment and/or boots)<br>(vs. no risk) | 0.25           | 0.27         | -0.28-0.79               | 0.35         |
| Frequency of manure removal                                                 |                |              |                          |              |
| In the neonates' area                                                       |                |              |                          |              |
| <1x/day<br>(vs. 1-2x/day)                                                   | 0.22           | 0.18         | -0.13-0.59               | 0.22         |
| In the pre-weaned calves' barn                                              |                |              |                          |              |
| <1x/day<br>1-2x/day<br>(vs. >3x/day)                                        | -0.54<br>-0.77 | 0.5<br>0.52  | -1.52-0.44<br>-1.79-0.25 | 0.28<br>0.24 |
| In the post-weaned calves' barn                                             |                |              |                          |              |
| <1x/day<br>1-2x/day<br>(vs. >3x/day)                                        | 0.02<br>-0.08  | 0.25<br>0.26 | -0.46-0.51<br>-0.59-0.42 | 0.92<br>0.74 |
| In the heifers' barn                                                        |                |              |                          |              |
| <1x/day<br>1-2x/day<br>(vs. >3x/day)                                        | 0.17<br>0.07   | 0.22<br>0.22 | -0.26-0.62<br>-0.36-0.52 | 0.43<br>0.72 |
| In the lactating cows' barn                                                 |                |              |                          |              |
| <1x/day<br>1-2x/day<br>(vs. >3x/day)                                        | -0.13<br>0.25  | 0.25<br>0.15 | -0.64-0.36<br>-0.04-0.55 | 0.59<br>0.10 |
| In the dry cows' barn                                                       |                |              |                          |              |
| <1x/day<br>1-2x/day<br>(vs. >3x/day)                                        | 0.09<br>0.07   | 0.17<br>0.15 | -0.24-0.43<br>-0.22-0.37 | 0.58<br>0.61 |
| Cleaning management in the calf area                                        | 0.02           | 0.06         | -0.10-0.14               | 0.75         |
| In the neonates' area                                                       |                |              |                          |              |
| No disinfection, cleaning or washing                                        | 0.07           | 0.24         | -0.4-0.54                | 0.77         |
| Cleaning or washing                                                         | -0.17          | 0.33         | -0.83-0.48               | 0.60         |
| Disinfection 1-4x/year<br>(vs. regular disinfection <sup>3</sup> )          | 0.02           | 0.23         | -0.44-0.48               | 0.93         |
| In the pre-weaned calves' barn                                              |                |              |                          |              |
| No disinfection, cleaning or washing                                        | -0.10          | 0.29         | -0.68-0.47               | 0.73         |
| Cleaning or washing                                                         | -0.30          | 0.67         | -1.62-1                  | 0.64         |
| Disinfection 1-4x/year<br>(vs. regular disinfection <sup>3</sup> )          | -0.19          | 0.33         | -0.84-0.45               | 0.56         |

|                                                                                     |        |      |             |             |
|-------------------------------------------------------------------------------------|--------|------|-------------|-------------|
| In the post-weaned calves' barn                                                     |        |      |             |             |
| No disinfection, cleaning or washing                                                | 0.21   | 0.86 | -1.47-1.89  | 0.81        |
| Cleaning or washing                                                                 | <0.001 | 1.21 | -2.37-2.37  | 1           |
| Disinfection 1-4x/year<br>(vs. regular disinfection <sup>3</sup> )                  | <0.001 | 0.90 | -1.77-1.77  | 1           |
| <b>Milk feeding</b>                                                                 |        |      |             |             |
| Powdered milk<br>(vs. fresh milk)                                                   | -0.63  | 0.24 | -1.10--0.15 | <b>0.01</b> |
| Leftovers from the cows' feed                                                       |        |      |             |             |
| Given to post-weaned calves                                                         |        |      |             |             |
| Yes<br>(vs. no)                                                                     | -0.21  | 0.23 | -0.66-0.23  | 0.35        |
| Given to heifers                                                                    |        |      |             |             |
| Yes<br>(vs. no)                                                                     | 0.04   | 0.16 | -0.28-0.36  | 0.81        |
| Possible fecal contamination of the calves' feed with feces of older animals        |        |      |             |             |
| Yes<br>(vs. no)                                                                     | -0.23  | 0.29 | -0.80-0.34  | 0.43        |
| Possible contamination of the calves' water with feces of older animals             |        |      |             |             |
| Yes<br>(vs. no)                                                                     | -0.20  | 0.5  | -1.17-0.78  | 0.69        |
| Runoff from the manure pile in the environment                                      |        |      |             |             |
| Yes<br>(vs. no)                                                                     | 0.18   | 0.15 | -0.11-0.46  | 0.23        |
| Use of manure equipment for feed transport                                          |        |      |             |             |
| Yes<br>(vs. no)                                                                     | -0.20  | 0.39 | -0.96-0.56  | 0.60        |
| Use of manure and/or slurry for fertilization                                       |        |      |             |             |
| For pastures, including calf pastures                                               | 0.21   | 0.4  | -0.55-0.97  | 0.60        |
| For cows' and heifers' pastures<br>(vs. for crop land and/or hay meadows)           | 0.18   | 0.4  | -0.6-0.97   | 0.64        |
| <b>Heifers sharing alpine pastures with other animal categories from their farm</b> |        |      |             |             |
| Yes<br>(vs. no)                                                                     | -0.24  | 0.17 | -0.58-0.10  | <b>0.17</b> |
| Lactating cows sharing alpine pastures with other animal categories from their farm |        |      |             |             |
| Yes<br>(vs. no)                                                                     | -0.2   | 0.33 | -0.85-0.44  | 0.54        |
| Dry cows sharing alpine pastures with other animal categories from their farm       |        |      |             |             |
| Yes<br>(vs. no)                                                                     | -0.22  | 0.23 | -0.67-0.24  | 0.35        |
| Occurrence of diseases in calves at the time of farm visit                          |        |      |             |             |
| Yes<br>(vs. no)                                                                     | -0.18  | 0.16 | -0.49-0.13  | 0.25        |
| Occurrence of diseases in heifers at the time of farm visit                         |        |      |             |             |
| Yes<br>(vs. no)                                                                     | 0.23   | 0.37 | -0.50-0.97  | 0.53        |
| <b>Occurrence of diseases in lactating cows at the time of farm visit</b>           |        |      |             |             |
| Yes<br>(vs. no)                                                                     | -0.28  | 0.14 | -0.56-0.00  | <b>0.05</b> |

<sup>1</sup>SE: Standard Error

<sup>2</sup>CI: Confidence Interval

<sup>3</sup>Regular disinfection: after each use (individual igloo) or each group  
See also Tables I and III for definitions of the variables
